# Supplementary figures and images for: Life-cycle assessment of renewable fuel production via hydrothermal liquefaction of manure in Germany
Source: Royal Society of Chemistry journal article supplement (doi:10.1039/d3se00646h), 2023-01-01

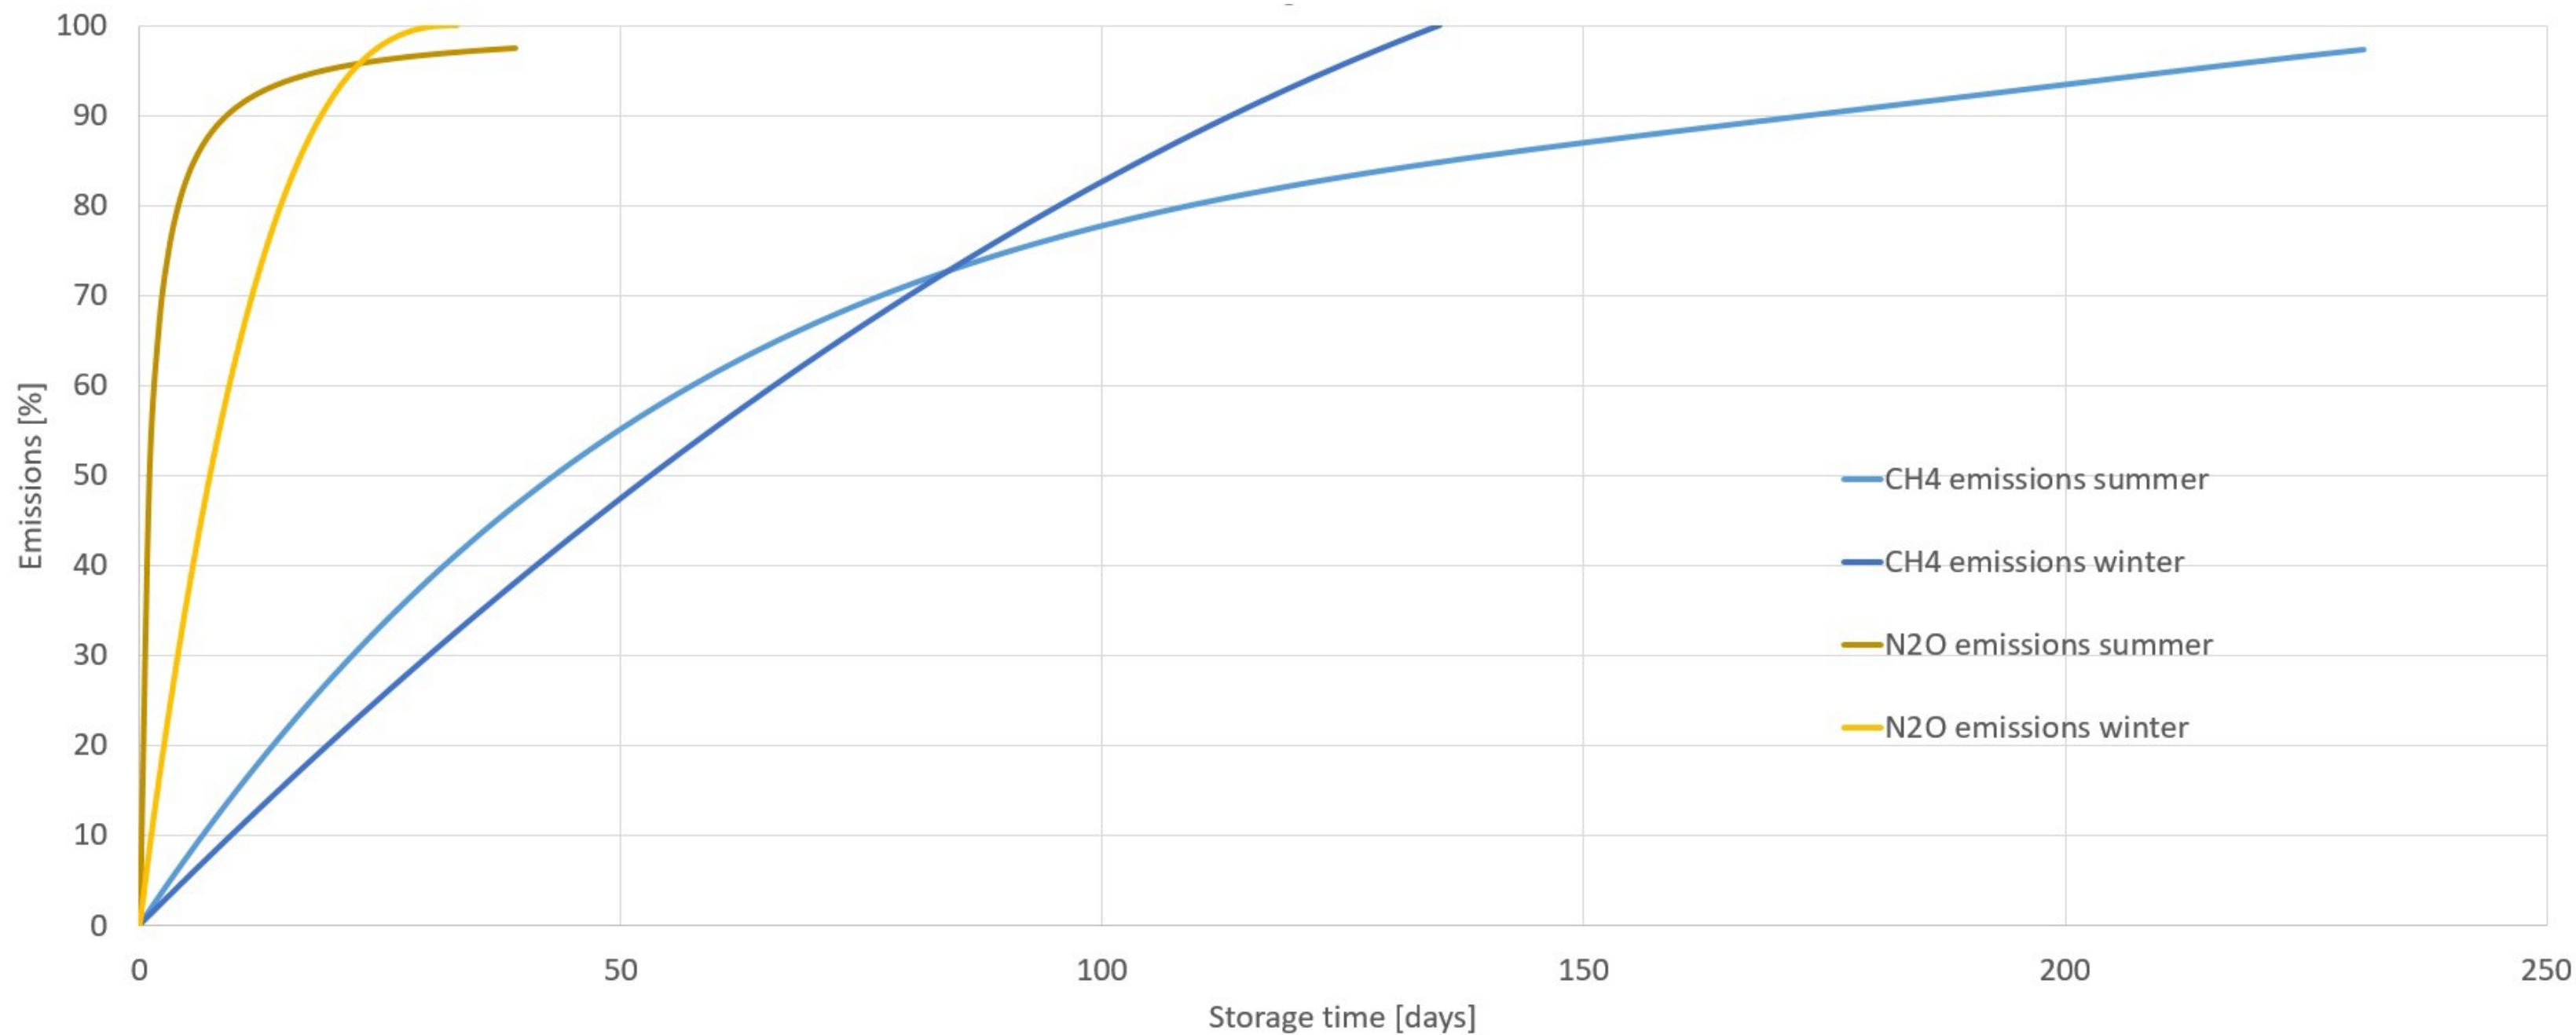

Supplement: d3se00646h4.pdf [file d3se00646h4.pdf]
